# Supplementary material for: Transition metal-rich mesoporous silicas and their enhanced catalytic properties
Source: Royal Society of Chemistry journal article supplement (doi:10.1039/c4cy00688g), 2014-01-01
Supplement: c4cy00688g1.pdf [file c4cy00688g1.pdf]

## Transition Metals-rich Mesoporous Silica and their enhanced Catalytic Property

Baowang Lu,\* Katsuya Kawamotoa

Graduate School of Environmental and Life Science, Okayama University,

3-1-1Tsushima-naka, Kita-ku, Okayama-shi, Okayama, 700-8530, Japan.

Tel: +81-86-2518842, E-mail: baowanglu@okayama-u.ac.jp

### Synthesis producer:

The synthesis of Ni-rich mesoporous silica (Si/Ni = 5) was carried out as follows.

(1) Nickel (Ni) ammonia (NH<sub>3</sub>) complex ions was prepared using 1.77 g of Ni(NO<sub>3</sub>)<sub>2</sub>•6H<sub>2</sub>O and 2.4 g of NH<sub>3</sub> solution (28 wt%).

(2) 3.52 g of Surfactant C<sub>16</sub>TMABr was dissolved in 400 g of water and 400 g of methanol, and then 4.62 g of TMOS was added at room temperature. After stirring for 30 min, the above transition metal ammonia complex ions was added, then aged 24 h under a static condition. The white solid product obtained was filtered, washed thoroughly with deionized water, dried overnight at room temperature, and calcined at 550 °C for 10 h.

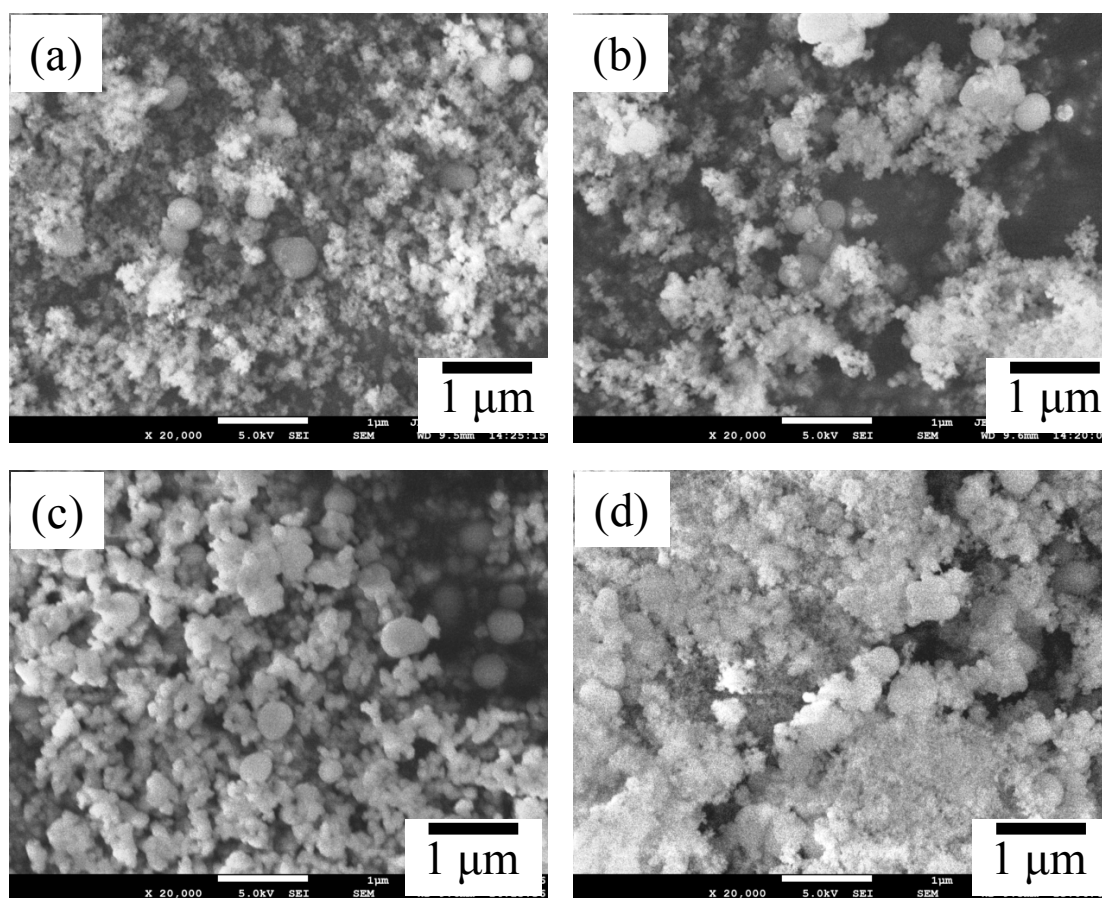

**Figure 1S.** SEM images of M-MCM-41 with Si/M mole ratio of 5. (a) Ni-MCM-41, (b) Cu-NCM-41, (c) Zn-MCM-41, (d) Co-MCM-41.

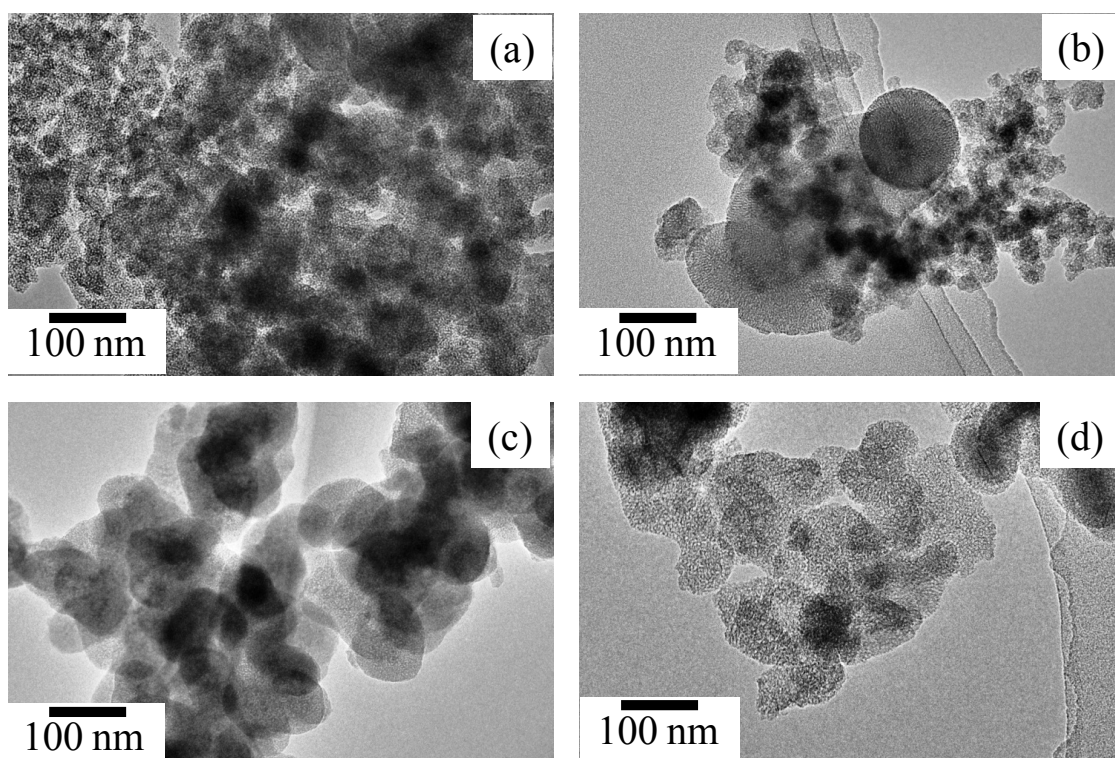

**Figure 2S.** TEM images of M-MCM-41 with Si/M mole ratio of 5. (a) Ni-MCM-41, (b) Cu-MCM-41, (c) Zn-MCM-41, (d) Co-MCM-41.
